# Supplementary material for: Flexible Symmetric-Defection Antenna with Bending and Thermal Insensitivity for Miniaturized UAV
Source: MDPI journal article supplement (doi:10.3390/mi15010159), 2024-01-21
Supplement: s1 [file s1]

# Supplementary Materials

## Flexible Symmetric-Defection Antenna with Bending and Thermal Insensitivity for Miniaturized UAV

Xueli Nan <sup>1,2</sup>, Tongtong Kang <sup>1</sup>, Zhonghe Zhang <sup>3</sup>, Xin Wang <sup>1</sup>, Jiale Zhang <sup>1</sup>, Yusheng Lei <sup>4</sup>, Libo Gao <sup>4</sup>, Jianli Cui <sup>5,\*</sup> and Hongcheng Xu <sup>6,\*</sup>

- <sup>1</sup> School of Automation and Software Engineering, Shanxi University, Taiyuan 030006, China; nanxueli@sxu.edu.cn (X.N.); 202123603013@email.sxu.edu.cn (T.K.); 202123601010@email.sxu.edu.cn (X.W.); 202123603033@email.sxu.edu.cn (J.Z.)
- <sup>2</sup> School of Biomedical Engineering, Shanghai Jiao Tong University, Shanghai 200030, China
- <sup>3</sup> College of Electronics and Information Engineering, Shenzhen University, Shenzhen 518061, China; zzh422384683@163.com
- <sup>4</sup> Pen-Tung Sah Institute of Micro-Nano Science and Technology, Xiamen University, Xiamen 361102, China; 19920231151619@stu.xmu.edu.cn (Y.L.); lbgao@xmu.edu.cn (L.G.)
- <sup>5</sup> School of Physics and Electronics Engineering, Yuncheng University, Yuncheng 044000, China
- <sup>6</sup> School of Instrument Science and Technology, Xi'an Jiaotong University, Xi'an 710049, China
- \* Correspondence: cuijianli@ycu.edu.cn (J.C.); hongc187@outlook.com (H.X.); Tel.: +86-183-347-89099 (J.C.); +86-187-341-26627 (H.X.)

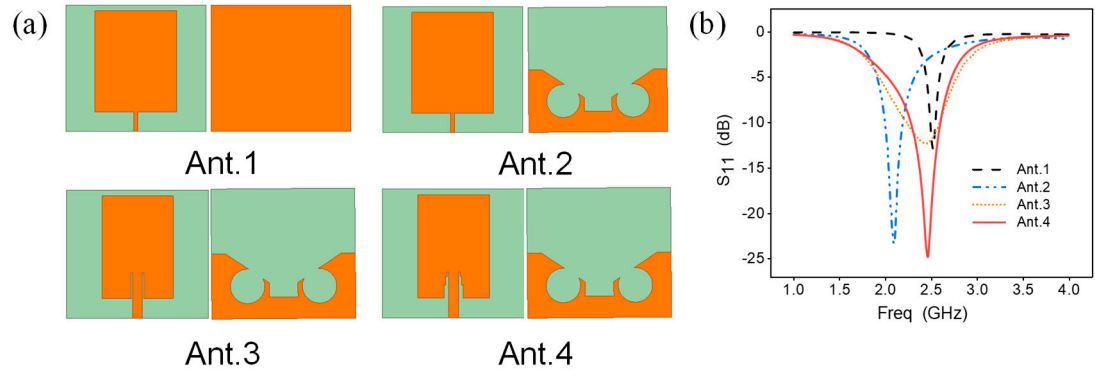

**Figure S1** (a) Four antennas with different structure designs. (b) Return loss results of four antennas.

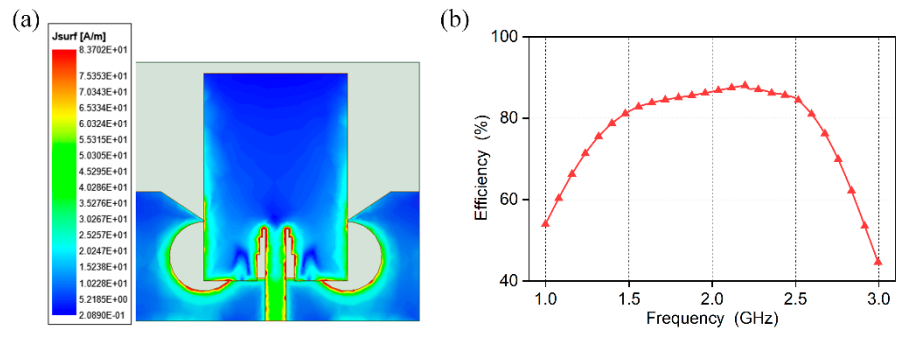

**Figure S2** (a) Surface current distribution of FSDA at 2.45 GHz. (b) Radiation efficiency.

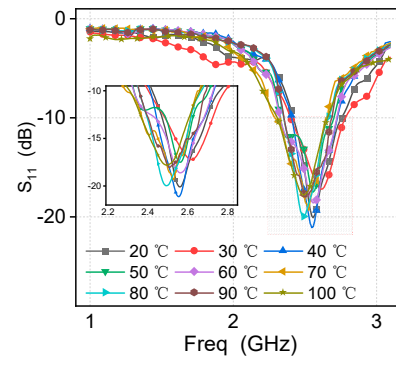

**Figure S3** Return loss changes versus the temperature.

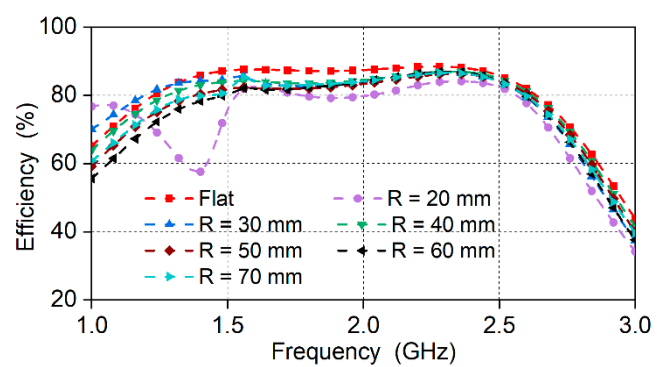

**Figure S4** Radiation efficiency at various bending radii and flat.

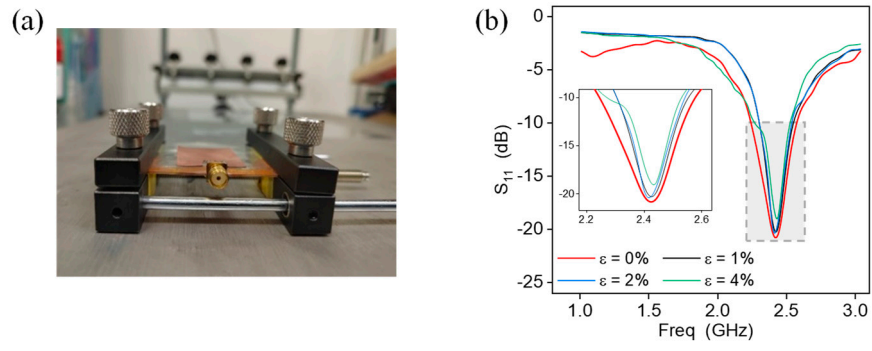

**Figure S5** FSDA's stretching performance. (a) Stretching control machine. (b) Return loss changes of the FSDA versus different stretching strains.

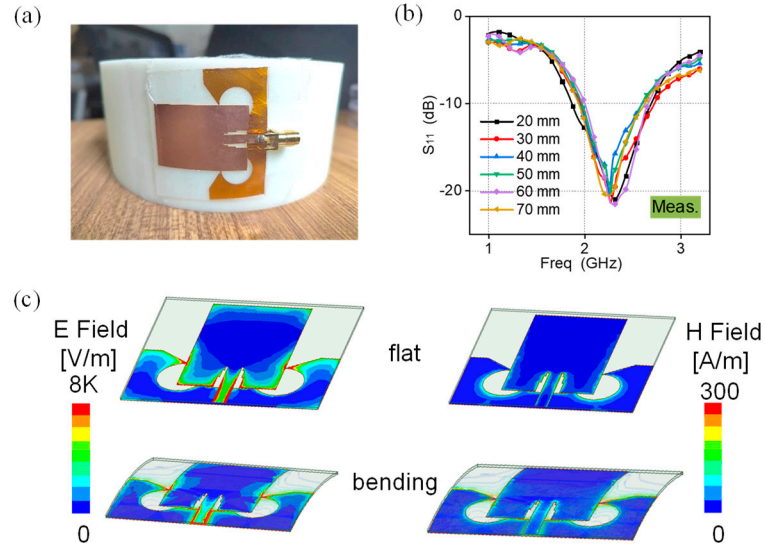

**Figure S6** FSDA's bending performance (E-plane). (a) Optical image when the FSDA is attached to a cylinder surface along with the circumference direction. (b) Measured results for  $S_{11}$  with different bending radii. (c) Electric and magnetic field comparison while the FSDA is flat (top) and bending (bottom).

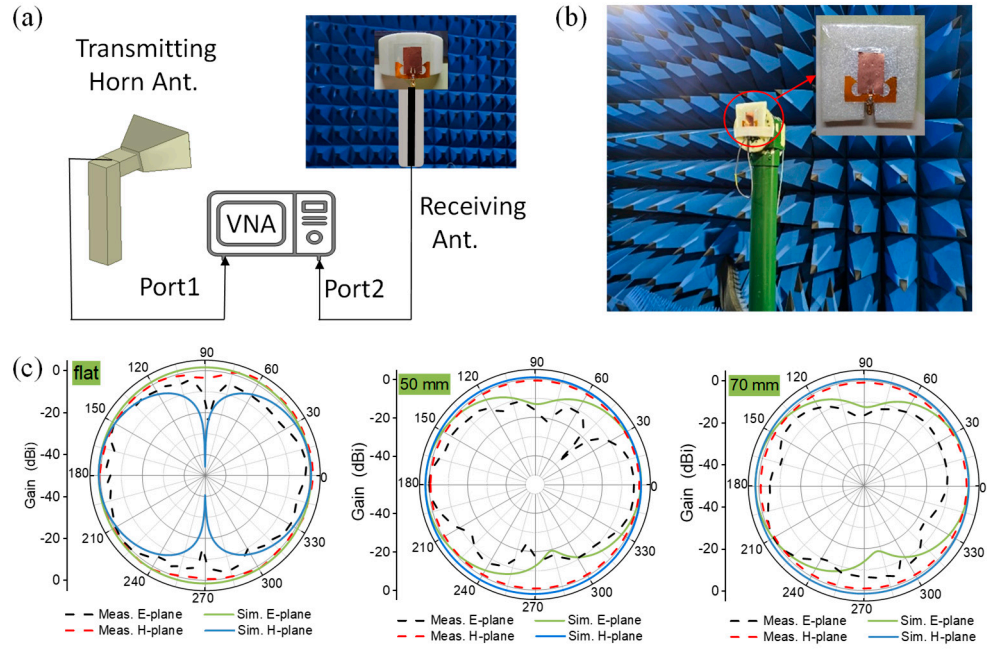

**Figure S7** Comparison of the radiation patterns. (a) Schematic illustration of the free space testing. (b) Optical image of the tested antenna at a rotating platform in the anechoic chamber. (c) Measured and simulated radiation patterns at the H-plane and E-plane of the FSDA under three states, flat (left), conformal cylinder with a radius of 50 mm (middle), and 70 mm (right).



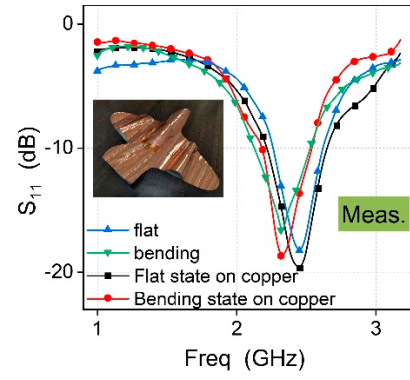

**Figure S8** Measured results for the return loss while the antenna is tested with different statues and an optical image of the antenna mounted on the copper-covered 3D-printed UAV.
